# Supplementary material
Source: PubMed Central journal article supplement (PMC3249086)
Supplement: supp_M111.256271_jbc.M111.256271-1.pdf [file supp_M111.256271_jbc.M111.256271-1.pdf]

**Supplemental Table 1**      **List of oligonucleotides used**  
 Underlined sequences indicate restriction sites

| <b>Oligonucleotide</b> | <b>Sequence</b>                                | <b>Use</b>                                                          |
|------------------------|------------------------------------------------|---------------------------------------------------------------------|
| T16-F                  | GGCTCTAG <u>A</u> ATGGATT <u>C</u> GAAAAATGGAA | TCP16 and<br>ΔTCP16<br>cloning in<br>pMAL-c2                        |
| T16-R                  | GCGCTCGAGAAACTGTGGTTGTGGCTG                    | TCP16<br>cloning in<br>pMAL-c2                                      |
| ΔT20-F                 | CCCGGAT <u>C</u> CCCCAAGAACCTAAATCGTC          | ΔTCP20<br>cloning in<br>pMAL-c2                                     |
| ΔT20-R                 | CGCAAGCTT <u>G</u> AGACCCACCTTGATGATGG         | ΔTCP20<br>cloning in<br>pMAL-c2                                     |
| ΔT16-R                 | GGGCTCGCGCTAGGAGGTGGTGGTGACAC                  | ΔTCP16<br>cloning in<br>pMAL-c2                                     |
| ΔT4-F                  | GGCGGAT <u>C</u> CATGTCTGACGACCAATTC           | ΔTCP4<br>cloning in<br>pMAL-c2                                      |
| ΔT4-R                  | GGCGT <u>C</u> GACTCAGGTTTTGGCGGTGGTTCT        | ΔTCP4<br>cloning in<br>pMAL-c2                                      |
| T16 G8D-F              | TTGAAAATTGATGGCCGTG                            | G8D-<br>ΔTCP16<br>mutation                                          |
| T16 G8D-R              | CACGGCCATCAATTTTCAA                            | G8D-<br>ΔTCP16<br>mutation                                          |
| T20 E8G-F              | ACTAAAGTCGGAGGTAGAG                            | E8G-<br>ΔTCP20<br>mutation                                          |
| T20 E8G-R              | CTCTACCTCCGACTTTAGT                            | E8G-<br>ΔTCP20<br>mutation                                          |
| T16 D11G-F             | TGGCCGTGGTCGTGCGCAT                            | D11G-<br>ΔTCP16<br>mutation                                         |
| T16 D11G-R             | ATGCGACGACCACGGCCA                             | D11G-<br>ΔTCP16<br>mutation                                         |
| T20 G11D-F             | AGGTAGAGATCGACGAATT                            | G11D-<br>ΔTCP20 and<br>b <sub>20</sub> HLH <sub>4</sub><br>mutation |
| T20 G11D-R             | AATTCGTGATCTCTACCT                             | G11D-<br>ΔTCP20 and<br>b <sub>20</sub> HLH <sub>4</sub><br>mutation |
| T4 D15G-F              | GCCACGTGGACGGCGCGT                             | D11G-<br>ΔTCP4 and<br>b <sub>4</sub> HLH <sub>20</sub><br>mutation  |
| T4 D15G-R              | ACGCGCCGTCCACGTGGC                             | D11G-<br>ΔTCP4 and<br>b <sub>4</sub> HLH <sub>20</sub><br>mutation  |
| QA-F                   | TCTACCTTCTTTAGCCGTGCAGACTTT                    | QA<br>construction                                                  |
| QA-R                   | ACGGCTAAAGAAGGTAGAGGTGCGACGA                   | QA<br>construction                                                  |
| QB-F                   | ACTAAAGTCGGGCCACGTGACCGGCGC                    | QB<br>construction                                                  |

|             |                                                    |                                                  |
|-------------|----------------------------------------------------|--------------------------------------------------|
| QB-R        | ACGTGGCCCGACTTTAGTGTGTCTGTC                        | QB construction                                  |
| QC-F        | ATTCGGATGTCTGCTCACACGGCGATT                        | b <sub>20</sub> HLH <sub>4</sub> construction    |
| QC-R        | GTGAGCAGACATCCGAATTCGTCGACC                        | b <sub>20</sub> HLH <sub>4</sub> construction    |
| QD-F        | GTGAGACTCCCTGCTCTTTGTGCTGCT                        | b <sub>4</sub> HLH <sub>20</sub> construction    |
| QD-R        | AAGAGCAGGGAGTCTCACGCGCCGGTC                        | b <sub>4</sub> HLH <sub>20</sub> construction    |
| ΔT4 ΔCTAK-F | AGCAAAGTCGGGCCACGTGACCGGCCG                        | ΔCTAK-TCP4 construction                          |
| ΔT4 ΔCTAK-R | ACGTGGCCCGACTTTGCTGTGGCGGTC                        | ΔCTAK-TCP4 construction                          |
| ΔT16 CTAK-F | ACGGCTAAAGGGCCACGTGATCGTCGCATTCGG                  | CTAK-TCP16 construction                          |
| ΔT16 CTAK-R | TGGCCCTTTAGCCGTACCAATTTTCAAATGGCGG                 | CTAK-TCP16 construction                          |
| T16EAR-R    | GCGCTCGAGAAACTGTGGTTGTGGCTG                        | Wild type and mutant 35S::TCP16-EAR construction |
| EAR-F       | TCGACTTGATTTGGATCTTGAGTTGAGACTTGGATTGCTTGAGCT      | Wild type and mutant 35S::TCP16-EAR construction |
| EAR-R       | CAAGCGAATCCAAGTCTCAACTCAAGATCCAAATCAAG             | Wild type and mutant 35S::TCP16-EAR construction |
| EAR-XK      | GGCCTCGAGGTACCTCAAGCGAATCCAAGTCTC                  | Wild type and mutant 35S::TCP16-EAR construction |
| T-selex     | GATGAAGCTTCCTGGACAATNNGGNCCNNGCAGCCACTGTAGAATTCTG  | SELEX assay                                      |
| R1          | GATGAAGCTTCCTGGACAAT                               | SELEX cycle amplification                        |
| R2          | CAGAATTCTACAGTGGCTGC                               | SELEX cycle amplification                        |
| C20         | AATTCAGATCTGTGGGACCGGGAG                           | EMSA assays                                      |
| C20c        | GATCCTCCCGGTCCCACAGATCTG                           | EMSA assays                                      |
| C16         | AATTCAGATCTGTGGACCGGGAG                            | EMSA assays                                      |
| C16c        | GATCCTCCCGGTCCCACAGATCTG                           | EMSA assays                                      |
| C I-II      | GATGAAGCTTCCTGGACAATGTGGGCCCGGGCAGCCACTGTAGAATTCTG | Footprinting assays                              |
