# Supplementary material
Source: PubMed Central journal article supplement (PMC3249086)
Supplement: supp_M111.256271_jbc.M111.256271-2.pdf [file supp_M111.256271_jbc.M111.256271-2.pdf]

**Supplemental Table 2**      **Gene names and identifiers of selected sequences used in the phylogenetic analysis**

| <b>Organism Name</b> | <b>Gene Name</b> | <b>Identifier</b>         |
|----------------------|------------------|---------------------------|
| Aquilegia coerulea   | 18159388Ac       | AcoGoldSmith_v1.006771m.g |
| Aquilegia coerulea   | 18140802Ac       | AcoGoldSmith_v1.006321m.g |
| Aquilegia coerulea   | 18150763Ac       | AcoGoldSmith_v1.017640m.g |
| Aquilegia coerulea   | 18142751Ac       | AcoGoldSmith_v1.004658m.g |
| Aquilegia coerulea   | 18159907Ac       | AcoGoldSmith_v1.006251m.g |
| Aquilegia coerulea   | 18160118Ac       | AcoGoldSmith_v1.021359m.g |
| Aquilegia coerulea   | 18163166Ac       | AcoGoldSmith_v1.005255m.g |
| Aquilegia coerulea   | 18162118Ac       | AcoGoldSmith_v1.006913m.g |
| Aquilegia coerulea   | 18163482Ac       | AcoGoldSmith_v1.022388m.g |
| Aquilegia coerulea   | 18164188Ac       | AcoGoldSmith_v1.005717m.g |
| Arabidopsis lyrata   | 16062501Al       | 16062501_locus            |
| Arabidopsis lyrata   | 16047680Al       | 16047680_locus            |
| Arabidopsis lyrata   | 16056074Al       | 16056074_locus            |
| Arabidopsis lyrata   | 16044941Al       | 16044941_locus            |
| Arabidopsis lyrata   | 16050017Al       | 16050017_locus            |
| Arabidopsis lyrata   | 895047Al         | 16049858_locus            |
| Arabidopsis lyrata   | 16041875Al       | 16041875_locus            |
| Arabidopsis lyrata   | 16059627Al       | 16059627_locus            |
| Arabidopsis lyrata   | 897773Al         | 16044723_locus            |
| Arabidopsis lyrata   | 905662Al         | 16038674_locus            |
| Arabidopsis lyrata   | 902126Al         | 16041186_locus            |
| Arabidopsis lyrata   | 16047865Al       | 16047865_locus            |
| Arabidopsis lyrata   | 16055448Al       | 16055448_locus            |
| Arabidopsis lyrata   | 898223Al         | 16047957_locus            |
| Arabidopsis lyrata   | 16057730Al       | 16057730_locus            |
| Arabidopsis lyrata   | 16060581Al       | 16060581_locus            |
| Arabidopsis lyrata   | 908782Al         | 16060645_locus            |
| Arabidopsis lyrata   | 16061974Al       | 16061974_locus            |
| Arabidopsis lyrata   | 16061733Al       | 16061733_locus            |
| Arabidopsis thaliana | AtTCP10          | AT2G31070                 |
| Arabidopsis thaliana | AtTCP16          | AT3G45150                 |
| Arabidopsis thaliana | AtTCP11          | AT2G37000                 |
| Arabidopsis thaliana | AtTCP14          | AT3G47620                 |
| Arabidopsis thaliana | AtTCP15          | AT1G69690                 |
| Arabidopsis thaliana | AtTCP22          | AT1G72010                 |
| Arabidopsis thaliana | AtTCP23          | AT1G35560                 |
| Arabidopsis thaliana | AtTCP20          | AT3G27010                 |
| Arabidopsis thaliana | AtTCP21          | AT5G08330                 |
| Arabidopsis thaliana | AtTCP19          | AT5G51910                 |
| Arabidopsis thaliana | AtTCP9           | AT2G45680                 |
| Arabidopsis thaliana | AtTCP8           | AT1G58100                 |
| Arabidopsis thaliana | AtTCP7           | AT5G23280                 |
| Arabidopsis thaliana | AtTCP6           | AT5G41030                 |
| Arabidopsis thaliana | 17362435At       | AT3G15030                 |
| Arabidopsis thaliana | 17353720At       | AT1G68800                 |
| Arabidopsis thaliana | 17372999At       | AT5G08070                 |
| Arabidopsis thaliana | 17351927At       | AT1G53230                 |
| Arabidopsis thaliana | 17369179At       | AT4G18390                 |
| Arabidopsis thaliana | 17350301At       | AT1G30210                 |

|                                |            |                           |
|--------------------------------|------------|---------------------------|
| <i>Arabidopsis thaliana</i>    | 17360709At | AT3G02150                 |
| <i>Arabidopsis thaliana</i>    | 17378847At | AT5G60970                 |
| <i>Arabidopsis thaliana</i>    | 17362913At | AT3G18550                 |
| <i>Brachypodium distachyon</i> | 16476671Bd | Bradi1g45220              |
| <i>Brachypodium distachyon</i> | 16487764Bd | Bradi2g59240              |
| <i>Brachypodium distachyon</i> | 16495220Bd | Bradi3g59320              |
| <i>Brachypodium distachyon</i> | 16500096Bd | Bradi4g41430              |
| <i>Brachypodium distachyon</i> | 16486650Bd | Bradi2g50690              |
| <i>Brachypodium distachyon</i> | 16499368Bd | Bradi4g35520              |
| <i>Brachypodium distachyon</i> | 16498028Bd | Bradi4g24550              |
| <i>Brachypodium distachyon</i> | 16492304Bd | Bradi3g36590              |
| <i>Brachypodium distachyon</i> | 16486585Bd | Bradi2g50190              |
| <i>Brachypodium distachyon</i> | 16499383Bd | Bradi4g35670              |
| <i>Brachypodium distachyon</i> | 16483278Bd | Bradi2g20060              |
| <i>Brachypodium distachyon</i> | 16495344Bd | Bradi3g60350              |
| <i>Brachypodium distachyon</i> | 16500844Bd | Bradi5g02880              |
| <i>Brachypodium distachyon</i> | 16502200Bd | Bradi5g16270              |
| <i>Brachypodium distachyon</i> | 16498681Bd | Bradi4g29980              |
| <i>Brachypodium distachyon</i> | 16493989Bd | Bradi3g49660              |
| <i>Brachypodium distachyon</i> | 16495616Bd | Bradi4g01550              |
| <i>Brachypodium distachyon</i> | 16472204Bd | Bradi1g06460              |
| <i>Brachypodium distachyon</i> | 16481658Bd | Bradi2g06890              |
| <i>Brachypodium distachyon</i> | 16472785Bd | Bradi1g11060              |
| <i>Brachypodium distachyon</i> | 16478318Bd | Bradi1g58450              |
| <i>Carica papaya</i>           | 16425287Cp | evm.TU.supercontig_70.118 |
| <i>Carica papaya</i>           | 16424588Cp | evm.TU.supercontig_66.26  |
| <i>Carica papaya</i>           | 16407854Cp | evm.TU.supercontig_13.48  |
| <i>Carica papaya</i>           | 16410588Cp | evm.TU.supercontig_17.1   |
| <i>Carica papaya</i>           | 16424427Cp | evm.TU.supercontig_65.20  |
| <i>Carica papaya</i>           | 16423768Cp | evm.TU.supercontig_60.75  |
| <i>Carica papaya</i>           | 16411203Cp | evm.TU.supercontig_179.29 |
| <i>Carica papaya</i>           | 16421375Cp | evm.TU.supercontig_5.261  |
| <i>Carica papaya</i>           | 16428802Cp | evm.TU.supercontig_94.62  |
| <i>Citrus clementina</i>       | Ci018801   | clementine0.9_018801m.g   |
| <i>Citrus clementina</i>       | Ci016144   | clementine0.9_016144m.g   |
| <i>Citrus clementina</i>       | Ci032670   | clementine0.9_032670m.g   |
| <i>Citrus clementina</i>       | Ci028015   | clementine0.9_028015m.g   |
| <i>Citrus clementina</i>       | Ci015044   | clementine0.9_015044m.g   |
| <i>Citrus clementina</i>       | Ci015257   | clementine0.9_015257m.g   |
| <i>Citrus clementina</i>       | Ci021764   | clementine0.9_021764m.g   |
| <i>Citrus clementina</i>       | Ci008223   | clementine0.9_008223m.g   |
| <i>Citrus clementina</i>       | Ci015906   | clementine0.9_015906m.g   |
| <i>Citrus clementina</i>       | Ci018374   | clementine0.9_018374m.g   |
| <i>Citrus clementina</i>       | Ci012352   | clementine0.9_012352m.g   |
| <i>Citrus clementina</i>       | Ci010976   | clementine0.9_010976m.g   |
| <i>Citrus clementina</i>       | Ci013545   | clementine0.9_013545m.g   |
| <i>Citrus clementina</i>       | Ci032667   | clementine0.9_032667m.g   |
| <i>Citrus clementina</i>       | Ci011097   | clementine0.9_011097m.g   |
| <i>Citrus clementina</i>       | Ci013585   | clementine0.9_013585m.g   |
| <i>Citrus clementina</i>       | Ci012071   | clementine0.9_012071m.g   |
| <i>Cucumis sativus</i>         | 385930Cs   | Cucsa.385930              |
| <i>Cucumis sativus</i>         | 16955801Cs | Cucsa.076020              |
| <i>Cucumis sativus</i>         | 16968477Cs | Cucsa.197650              |
| <i>Cucumis sativus</i>         | 16968642Cs | Cucsa.198860              |

|                    |            |                         |
|--------------------|------------|-------------------------|
| Cucumis sativus    | 16973828Cs | Cucsa.273460            |
| Cucumis sativus    | 16953760Cs | Cucsa.047860            |
| Cucumis sativus    | 16961496Cs | Cucsa.122730            |
| Eucalyptus grandis | Eg021099   | Egrandis_v1_0.021099m.g |
| Eucalyptus grandis | Eg038354   | Egrandis_v1_0.038354m.g |
| Eucalyptus grandis | Eg018326   | Egrandis_v1_0.018326m.g |
| Eucalyptus grandis | Eg017323   | Egrandis_v1_0.017323m.g |
| Eucalyptus grandis | Eg018268   | Egrandis_v1_0.018268m.g |
| Eucalyptus grandis | Eg011715   | Egrandis_v1_0.011715m.g |
| Eucalyptus grandis | Eg050438   | Egrandis_v1_0.050438m.g |
| Eucalyptus grandis | Eg051391   | Egrandis_v1_0.051391m.g |
| Eucalyptus grandis | Eg016729   | Egrandis_v1_0.016729m.g |
| Eucalyptus grandis | Eg049885   | Egrandis_v1_0.049885m.g |
| Eucalyptus grandis | Eg014141   | Egrandis_v1_0.014141m.g |
| Eucalyptus grandis | Eg018583   | Egrandis_v1_0.018583m.g |
| Eucalyptus grandis | Eg040933   | Egrandis_v1_0.040933m.g |
| Eucalyptus grandis | Eg015738   | Egrandis_v1_0.015738m.g |
| Eucalyptus grandis | Eg014606   | Egrandis_v1_0.014606m.g |
| Eucalyptus grandis | Eg053624   | Egrandis_v1_0.053624m.g |
| Glycine max        | 20210Gm    | Glyma11g20200.1         |
| Glycine max        | 16308891Gm | Glyma18g15410           |
| Glycine max        | 16263638Gm | Glyma06g20660           |
| Glycine max        | 16312889Gm | Glyma19g26560           |
| Glycine max        | 16305134Gm | Glyma17g10760           |
| Glycine max        | 16247769Gm | Glyma02g11780           |
| Glycine max        | 16301621Gm | Glyma16g05840           |
| Glycine max        | 16273427Gm | Glyma08g41070           |
| Glycine max        | 16288241Gm | Glyma12g28970           |
| Glycine max        | 16257920Gm | Glyma05g01130           |
| Glycine max        | 16267977Gm | Glyma07g25430           |
| Glycine max        | 16300993Gm | Glyma16g00580           |
| Glycine max        | 16311152Gm | Glyma18g51580           |
| Glycine max        | 16263902Gm | Glyma06g23410           |
| Glycine max        | 16272606Gm | Glyma08g27150           |
| Glycine max        | 16289957Gm | Glyma13g07480           |
| Glycine max        | 16312005Gm | Glyma19g05910           |
| Glycine max        | 16305405Gm | Glyma17g13060           |
| Glycine max        | 16292624Gm | Glyma13g34690           |
| Glycine max        | 16305529Gm | Glyma17g14160           |
| Glycine max        | 16281410Gm | Glyma10g38510           |
| Glycine max        | 16287440Gm | Glyma12g14200           |
| Glycine max        | 16281483Gm | Glyma10g39140           |
| Glycine max        | 16290997Gm | Glyma13g20710           |
| Glycine max        | 16258200Gm | Glyma05g03610           |
| Glycine max        | 16256517Gm | Glyma04g32340           |
| Glycine max        | 16291962Gm | Glyma13g29160           |
| Glycine max        | 16250847Gm | Glyma03g02090           |
| Glycine max        | 16292871Gm | Glyma13g36840           |
| Glycine max        | 16289009Gm | Glyma12g35720           |
| Glycine max        | 16304900Gm | Glyma17g08760           |
| Glycine max        | 16287845Gm | Glyma12g20160           |
| Glycine max        | 16272765Gm | Glyma08g28690           |
| Glycine max        | 16265078Gm | Glyma06g43720           |
| Glycine max        | 16259812Gm | Glyma05g27370           |

|                     |            |                      |
|---------------------|------------|----------------------|
| Glycine max         | 16270643Gm | Glyma08g10350        |
| Glycine max         | 16311029Gm | Glyma18g50370        |
| Glycine max         | 16311812Gm | Glyma19g03810        |
| Glycine max         | 16257826Gm | Glyma05g00300        |
| Glycine max         | 16278059Gm | Glyma09g42140        |
| Glycine max         | 16264256Gm | Glyma06g34330        |
| Glycine max         | 16288777Gm | Glyma12g33640        |
| Glycine max         | 16266669Gm | Glyma07g08710        |
| Glycine max         | 16263800Gm | Glyma06g22240        |
| Glycine max         | 16317250Gm | Glyma20g29330        |
| Glycine max         | 16316582Gm | Glyma20g23700        |
| Glycine max         | 16317170Gm | Glyma20g28670        |
| Glycine max         | 16258614Gm | Glyma05g07930        |
| Manihot esculenta   | 17981115Me | cassava4.1_011082m.g |
| Manihot esculenta   | 17987200Me | cassava4.1_004517m.g |
| Manihot esculenta   | 17967082Me | cassava4.1_013743m.g |
| Manihot esculenta   | 17960265Me | cassava4.1_032556m.g |
| Manihot esculenta   | 17962543Me | cassava4.1_034188m.g |
| Manihot esculenta   | 17968936Me | cassava4.1_025363m.g |
| Manihot esculenta   | 17972262Me | cassava4.1_006620m.g |
| Manihot esculenta   | 17962796Me | cassava4.1_028058m.g |
| Manihot esculenta   | 17963214Me | cassava4.1_032088m.g |
| Manihot esculenta   | 17987558Me | cassava4.1_022722m.g |
| Medicago truncatula | 17482774Mt | Medtr8g112220        |
| Medicago truncatula | 17473522Mt | Medtr7g018180        |
| Medicago truncatula | 17446280Mt | Medtr2g132520        |
| Mimulus guttatus    | 17684730Mg | mgv1a012180m.g       |
| Mimulus guttatus    | 17680013Mg | mgv1a006425m.g       |
| Mimulus guttatus    | 17686198Mg | mgv1a006538m.g       |
| Mimulus guttatus    | 17695167Mg | mgv1a022535m.g       |
| Mimulus guttatus    | 17675517Mg | mgv1a010742m.g       |
| Mimulus guttatus    | 17687507Mg | mgv1a023603m.g       |
| Mimulus guttatus    | 17690687Mg | mgv1a010901m.g       |
| Mimulus guttatus    | 17671707Mg | mgv1a005762m.g       |
| Mimulus guttatus    | 17691503Mg | mgv1a011793m.g       |
| Mimulus guttatus    | 17697396Mg | mgv1a011591m.g       |
| Mimulus guttatus    | 17693093Mg | mgv1a006727m.g       |
| Mimulus guttatus    | 17696794Mg | mgv1a013098m.g       |
| Mimulus guttatus    | 17687164Mg | mgv1a020323m.g       |
| Mimulus guttatus    | 17692947Mg | mgv1a017886m.g       |
| Mimulus guttatus    | 17676020Mg | mgv1a006656m.g       |
| Mimulus guttatus    | 17686317Mg | mgv1a025043m.g       |
| Mimulus guttatus    | 17681482Mg | mgv1a011892m.g       |
| Mimulus guttatus    | 17672532Mg | mgv1a011205m.g       |
| Mimulus guttatus    | 17674803Mg | mgv1a021669m.g       |
| Mimulus guttatus    | 17677950Mg | mgv1a014634m.g       |
| Oryza sativa        | OsTCP21    | Os07g05720           |
| Oryza sativa        | OsTCP1     | Os01g11550           |
| Oryza sativa        | OsTCP12    | Os03g30880           |
| Oryza sativa        | OsTCP17    | Os04g44440           |
| Oryza sativa        | OsTCP26    | Os11g07460           |
| Oryza sativa        | OsTCP7     | Os02g42380           |
| Oryza sativa        | OsTCP15    | Os04g11830           |
| Oryza sativa        | OsTCP28    | Os12g07480           |

|                       |            |                  |
|-----------------------|------------|------------------|
| Oryza sativa          | OsTCP19    | Os06g12230       |
| Oryza sativa          | OsTCP9     | Os02g51280       |
| Oryza sativa          | OsTCP23    | Os08g43160       |
| Oryza sativa          | OsTCP16    | Os01g69980       |
| Oryza sativa          | OsTCP25    | Os09g34950       |
| Oryza sativa          | 16850380Os | Os03g57190       |
| Oryza sativa          | 16869526Os | Os07g05720       |
| Oryza sativa          | 16843170Os | Os02g51310       |
| Oryza sativa          | 16835080Os | Os01g55750       |
| Oryza sativa          | 16881524Os | Os09g24480       |
| Oryza sativa          | 16849564Os | Os03g49880       |
| Oryza sativa          | 16877682Os | Os08g33530       |
| Oryza sativa          | 16862301Os | Os05g43760       |
| Physcomitrella patens | 18039912Ph | Pp1s332_35V6     |
| Physcomitrella patens | 18041192Ph | Pp1s207_110V6    |
| Physcomitrella patens | 18063809Ph | Pp1s348_6V6      |
| Physcomitrella patens | 18068748Ph | Pp1s446_21V6     |
| Physcomitrella patens | 18050840Ph | Pp1s67_183V6     |
| Physcomitrella patens | 18042157Ph | Pp1s356_40V6     |
| Physcomitrella patens | 110V6Ph    | XM_001782432     |
| Populus trichocarpa   | 18209605Pt | POPTR_0017s09820 |
| Populus trichocarpa   | 18216113Pt | POPTR_0003s16630 |
| Populus trichocarpa   | 18231329Pt | POPTR_0011s05430 |
| Populus trichocarpa   | 18220074Pt | POPTR_0019s11120 |
| Populus trichocarpa   | 18221392Pt | POPTR_0013s11510 |
| Populus trichocarpa   | 18234285Pt | POPTR_0001s13500 |
| Populus trichocarpa   | 18225061Pt | POPTR_0004s04600 |
| Populus trichocarpa   | 18225571Pt | POPTR_0004s23080 |
| Populus trichocarpa   | 18232641Pt | POPTR_0015s06980 |
| Populus trichocarpa   | 18238295Pt | POPTR_0001s33470 |
| Populus trichocarpa   | 18209353Pt | POPTR_0017s13980 |
| Populus trichocarpa   | 18234142Pt | POPTR_0015s13660 |
| Populus trichocarpa   | 18246527Pt | POPTR_0002s15360 |
| Populus trichocarpa   | 18230603Pt | POPTR_0011s09890 |
| Populus trichocarpa   | 18230206Pt | POPTR_0012s05660 |
| Populus trichocarpa   | 18240586Pt | POPTR_0010s14030 |
| Populus trichocarpa   | 18236843Pt | POPTR_0001s08590 |
| Populus trichocarpa   | 18229840Pt | POPTR_0012s13700 |
| Populus trichocarpa   | 18226839Pt | POPTR_0004s11510 |
| Populus trichocarpa   | 18220855Pt | POPTR_0013s12370 |
| Populus trichocarpa   | 18233253Pt | POPTR_0015s03140 |
| Populus trichocarpa   | 18225754Pt | POPTR_0004s06440 |
| Populus trichocarpa   | 18218990Pt | POPTR_0019s12110 |
| Populus trichocarpa   | 18227148Pt | POPTR_0009s01480 |
| Populus trichocarpa   | 18206849Pt | POPTR_0005s09250 |
| Populus trichocarpa   | 18231968Pt | POPTR_0011s02350 |
| Populus trichocarpa   | 18209307Pt | POPTR_0017s13050 |
| Populus trichocarpa   | 18223745Pt | POPTR_0014s07450 |
| Populus trichocarpa   | 18239062Pt | POPTR_0001s38480 |
| Populus trichocarpa   | 18251033Pt | POPTR_0016s11350 |
| Prunus persica        | 17647871Pp | ppa010032m.g     |
| Prunus persica        | 17648345Pp | ppa017864m.g     |
| Prunus persica        | 17645138Pp | ppa006389m.g     |
| Prunus persica        | 17646741Pp | ppa009925m.g     |

|                             |            |                 |
|-----------------------------|------------|-----------------|
| Prunus persica              | 17666244Pp | ppa022140m.g    |
| Prunus persica              | 17661007Pp | ppa021535m.g    |
| Prunus persica              | 17664732Pp | ppa027156m.g    |
| Prunus persica              | 17666782Pp | ppa016240m.g    |
| Prunus persica              | 17651445Pp | ppa018648m.g    |
| Prunus persica              | 17655443Pp | ppa015026m.g    |
| Prunus persica              | 17641148Pp | ppa007243m.g    |
| Prunus persica              | 17664952Pp | ppa004612m.g    |
| Prunus persica              | 17641009Pp | ppa014630m.g    |
| Prunus persica              | 17660534Pp | ppb024383m.g    |
| Prunus persica              | 17660278Pp | ppa007094m.g    |
| Prunus persica              | 17668341Pp | ppa015342m.g    |
| Prunus persica              | 17650534Pp | ppa004661m.g    |
| Ricinus communis            | 16817575Rc | 30093.t000015   |
| Ricinus communis            | 16820989Rc | 30167.t000005   |
| Ricinus communis            | 16819325Rc | 30138.t000133   |
| Ricinus communis            | 16805939Rc | 29693.t000006   |
| Ricinus communis            | 16822587Rc | 30174.t000341   |
| Ricinus communis            | 16815667Rc | 30014.t000010   |
| Ricinus communis            | 16807331Rc | 29738.t000043   |
| Ricinus communis            | 16804611Rc | 29646.t000049   |
| Ricinus communis            | 16823710Rc | 30192.t000004   |
| Selaginella moellendorffii  | CAOT1262Sm | CAOT1262        |
| Selaginella moellendorffii  | 15407669Sm | XM_002962733    |
| Sellaginella moellendorffii | 15406972Sm | 15406972_locus  |
| Sellaginella moellendorffii | 15407054Sm | 15407054_locus  |
| Sellaginella moellendorffii | 15419540Sm | 15419540_locus  |
| Setaria italica             | 18197064Si | SiPROV028309m.g |
| Setaria italica             | 18173673Si | SiPROV030445m.g |
| Setaria italica             | 18176917Si | SiPROV009299m.g |
| Setaria italica             | 18188805Si | SiPROV027784m.g |
| Setaria italica             | 18184307Si | SiPROV035672m.g |
| Setaria italica             | 18185750Si | SiPROV034597m.g |
| Setaria italica             | 18182019Si | SiPROV009824m.g |
| Setaria italica             | 18205895Si | SiPROV037094m.g |
| Setaria italica             | 18196462Si | SiPROV011671m.g |
| Setaria italica             | 18180899Si | SiPROV015319m.g |
| Setaria italica             | 18193228Si | SiPROV035277m.g |
| Setaria italica             | 18169927Si | SiPROV016156m.g |
| Setaria italica             | 18175983Si | SiPROV016702m.g |
| Setaria italica             | 18170681Si | SiPROV029159m.g |
| Sorghum bicolor             | 1972374Sb  | Sb06g016340     |
| Sorghum bicolor             | 1981475Sb  | Sb09g025340     |
| Sorghum bicolor             | 1963332Sb  | Sb03g034918     |
| Sorghum bicolor             | 1977676Sb  | Sb08g004610     |
| Sorghum bicolor             | 1950026Sb  | Sb01g006020     |
| Sorghum bicolor             | 1958290Sb  | Sb02g030260     |
| Sorghum bicolor             | 1976099Sb  | Sb07g021140     |
| Sorghum bicolor             | 1971716Sb  | Sb06g002260     |
| Sorghum bicolor             | 1955624Sb  | Sb02g003070     |
| Sorghum bicolor             | 1967363Sb  | Sb04g026970     |
| Sorghum bicolor             | 1964442Sb  | Sb03g044320     |
| Sorghum bicolor             | 1983141Sb  | Sb10g008030     |
| Sorghum bicolor             | 1963385Sb  | Sb03g035350     |

|                 |            |                   |
|-----------------|------------|-------------------|
| Sorghum bicolor | 1969405Sb  | Sb05g004800       |
| Sorghum bicolor | 1950625Sb  | Sb01g010690       |
| Sorghum bicolor | 1979098Sb  | Sb08g021690       |
| Sorghum bicolor | 1967495Sb  | Sb04g027960       |
| Sorghum bicolor | 1957550Sb  | Sb02g024450       |
| Sorghum bicolor | 1968723Sb  | Sb04g038140       |
| Sorghum bicolor | 1977675Sb  | Sb08g004600       |
| Sorghum bicolor | 1960224Sb  | Sb03g001940       |
| Sorghum bicolor | 1973218Sb  | Sb06g023130       |
| Vitis vinifera  | 17820778Vv | GSVIVG01008109001 |
| Vitis vinifera  | 17829521Vv | GSVIVG01020011001 |
| Vitis vinifera  | 17831815Vv | GSVIVG01023283001 |
| Vitis vinifera  | 17820701Vv | GSVIVG01008023001 |
| Vitis vinifera  | 17830615Vv | GSVIVG01021528001 |
| Vitis vinifera  | 17829974Vv | GSVIVG01020666001 |
| Vitis vinifera  | 17841387Vv | GSVIVG01036449001 |
| Vitis vinifera  | 17834941Vv | GSVIVG01027588001 |
| Vitis vinifera  | 17820873Vv | GSVIVG01008234001 |
| Vitis vinifera  | 17825262Vv | GSVIVG01014236001 |
| Vitis vinifera  | 17830339Vv | GSVIVG01021167001 |
| Vitis vinifera  | 17838763Vv | GSVIVG01032911001 |
| Vitis vinifera  | 17829417Vv | GSVIVG01019876001 |
| Vitis vinifera  | 17823706Vv | GSVIVG01011962001 |
| Vitis vinifera  | 17833975Vv | GSVIVG01026145001 |
| Zea mays        | ZM2G142751 | GRMZM2G142751     |
| Zea mays        | ZM2G093895 | GRMZM2G093895     |
| Zea mays        | ZM2G077755 | GRMZM2G077755     |
| Zea mays        | ZM2G003944 | GRMZM2G003944     |
| Zea mays        | ZM2G089361 | GRMZM2G089361     |
| Zea mays        | ZM2G166946 | GRMZM2G166946     |
| Zea mays        | ZM2G120151 | GRMZM2G120151     |
| Zea mays        | ZM2G178603 | GRMZM2G178603     |
| Zea mays        | ZM2G096610 | GRMZM2G096610     |
| Zea mays        | ZM2G445944 | GRMZM2G445944     |
| Zea mays        | ZMAC199782 | AC199782          |
| Zea mays        | ZM2G020805 | GRMZM2G020805     |
| Zea mays        | ZM2G166687 | GRMZM2G166687     |
| Zea mays        | ZM2G064628 | GRMZM2G064628     |
| Zea mays        | ZM2G078077 | GRMZM2G078077     |
| Zea mays        | ZM2G465091 | GRMZM2G465091     |
| Zea mays        | ZMAC233950 | AC233950          |
| Zea mays        | ZMAC190734 | AC190734          |
| Zea mays        | ZMAC205574 | AC205574          |

---
