# Supplementary material
Source: PubMed Central journal article supplement (PMC3249086)
Supplement: supp_M111.256271_jbc.M111.256271-3.pdf [file supp_M111.256271_jbc.M111.256271-3.pdf]

### Supplemental Table 3 Selection analysis of the TCP domain

The per-site non-synonymous *versus* synonymous substitution ratios (dN/dS) were estimated using the single-likelihood ancestor counting (SLAC) and fixed effects likelihood (FEL) algorithms from the HyPhy package at the specified significance level ( $p = 0.1$ ). Negative selected sites are indicated in grey.

| Codon | SLAC   |             | FEL   |               | Selection |
|-------|--------|-------------|-------|---------------|-----------|
|       | dN-dS  | p-value     | dN-dS | p-value       |           |
| 1     | -8.41  | 0.085416    | 0.192 | 0.0128442     | Negative  |
| 2     | -21.63 | 0.406       | 0.000 | 0.0205039     | Negative  |
| 3     | -23.20 | 0.0909      | 0.000 | 0.0000000343  | Negative  |
| 4     | -24.94 | 0.0556      | 0.000 | 0.000981285   | Negative  |
| 5     | -6.99  |             | 0.274 | 0.0212005     | Negative  |
| 6     | -19.67 | 0.44        | 0.000 | 0.00872722    | Negative  |
| 7     | -17.59 | 8.1         | 0.052 | 0.0730537     | Negative  |
| 8     | -3.42  |             | 0.249 | 0.070368      | Negative  |
| 9     | -14.79 | 0.0123457   | 0.000 | 0.000437215   | Negative  |
| 10    | -25.48 | 0.0116871   | 0.089 | 0.000611462   | Negative  |
| 11    | -31.18 | 0.0228777   | 0.000 | 0.0037283     | Negative  |
| 12    | -29.58 | 0.000164321 | 0.000 | 0.0212445     | Negative  |
| 13    | 0      |             | 1.003 |               |           |
| 14    | -14.69 | 0.00578451  | 0.213 | 0.000699847   | Negative  |
| 15    | -24.87 | 0.00404     | 0.000 | 0.0000002     | Negative  |
| 16    | -19.53 | 3.96        | 0.055 | 0.422766      | Negative  |
| 17    | -24.40 | 0.00276     | 0.000 | 0.00000001    | Negative  |
| 18    | -27.50 | 0.000331    | 0.000 | 0.00000013    | Negative  |
| 19    | -20.21 | 0.000569402 | 0.093 | 2.64999       | Negative  |
| 20    | -23.84 | 0.0151      | 0.015 | 0.0000203     | Negative  |
| 21    | -16.11 | 0.00215462  | 0.067 | 0.000190166   | Negative  |
| 22    | -17.05 | 0.836       | 0.013 | 0.000177176   | Negative  |
| 23    | -9.88  | 0.0583781   | 0.177 | 0.000153106   | Negative  |
| 24    | -5.61  |             | 0.340 | 0.0491138     | Negative  |
| 25    | -14.11 | 0.0140255   | 0.271 | 0.00863065    | Negative  |
| 26    | -30.05 | 0.00000319  | 0.000 | 0             | Negative  |
| 27    | -10.23 | 0.0266963   | 0.225 | 0.00456073    | Negative  |
| 28    | -21.82 | 0.000158638 | 0.080 | 0.0201178     | Negative  |
| 29    | -8.27  | 0.0653361   | 0.400 | 0.0714444     | Negative  |
| 30    | -13.91 | 0.0125875   | 0.191 | 0.0121672     | Negative  |
| 31    | -24.08 | 0.000159072 | 0.038 | 0.0156688     | Negative  |
| 32    | -23.38 | 0.144       | 0.037 | 0.00188459    | Negative  |
| 33    | -22.16 | 0.143       | 0.022 | 0.000013906   | Negative  |
| 34    | -15.98 | 0.00229467  | 0.110 | 9.45052       | Negative  |
| 35    | -17.77 | 0.00122444  | 0.109 | 0.00105743    | Negative  |
| 36    | -28.08 | 0.0142      | 0.000 | 0.000000001   | Negative  |
| 37    | -16.47 | 0.32        | 0.058 | 0.560949      | Negative  |
| 38    | -29.59 | 2.06        | 0.123 | 2.42665       | Negative  |
| 39    | -15.76 | 0.00574277  | 0.087 | 0.00046686    | Negative  |
| 40    | -10.61 | 0.0305353   | 0.190 | 0.00281179    | Negative  |
| 41    | -18.72 | 0.000181826 | 0.085 | 2.21957       | Negative  |
| 42    | -15.25 | 4.01        | 0.029 | 0.595163      | Negative  |
| 43    | -18.87 | 0.000903618 | 0.095 | 0.000106336   | Negative  |
| 44    | -16.75 | 0.000284061 | 0.091 | 0.567342      | Negative  |
| 45    | -22.62 | 6.8         | 0.078 | 0.0072417     | Negative  |
| 46    | -14.66 | 0.0210517   | 0.132 | 0.000330095   | Negative  |
| 47    | 0      |             | 0     |               |           |
| 48    | -26.35 | 0.00977623  | 0.000 | 0.00000000067 | Negative  |
| 49    | -12.71 | 0.00600761  | 0.124 | 0.000431052   | Negative  |
