# Supplementary material
Source: PubMed Central journal article supplement (PMC3249086)
Supplement: supp_M111.256271_jbc.M111.256271-4.pdf [file supp_M111.256271_jbc.M111.256271-4.pdf]

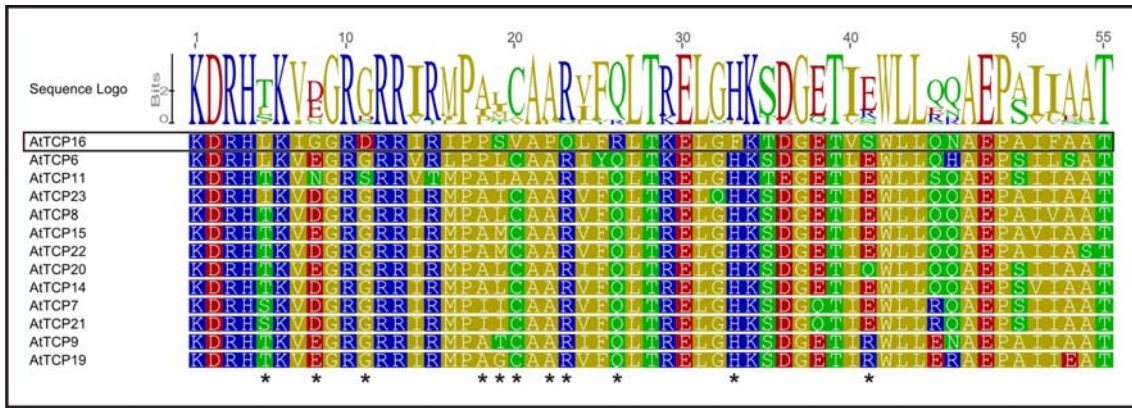

**Supplemental Fig. 1.** TCP domain sequences of Arabidopsis class I TCP proteins. The sequence of TCP16 is boxed. Basic, acid, hydrophobic and hydrophilic residues are marked with different colors. In the upper part, the derived consensus sequence is shown in a sequence logo. Positions not conserved in TCP16 are marked with an asterisk.
