# Supplementary material
Source: PubMed Central journal article supplement (PMC3249086)
Supplement: supp_M111.256271_jbc.M111.256271-5.pdf [file supp_M111.256271_jbc.M111.256271-5.pdf]

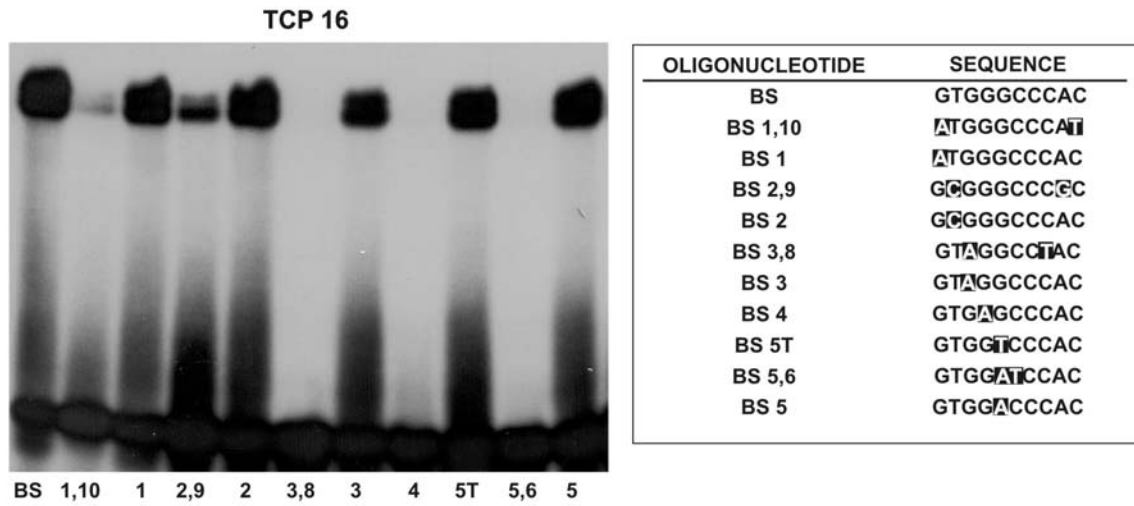

**Supplemental Fig. 2.** Binding of TCP16 to an oligonucleotide constructed on the basis of the consensus target sites of class I and class II proteins and variants with single or double changes at defined positions. The relevant sequences of the oligonucleotides used are shown in the right panel.
