# Supplementary material
Source: PubMed Central journal article supplement (PMC3249086)
Supplement: supp_M111.256271_jbc.M111.256271-6.pdf [file supp_M111.256271_jbc.M111.256271-6.pdf]

**A**

| Sequence                   | Frequency |
|----------------------------|-----------|
| AAT <b>GTGGACCCGG</b> GCA  | 6         |
| AAT <b>GTGGACCCCG</b> CAG  | 4         |
| AAT <b>GTGGACCCAG</b> GCA  | 3         |
| AAT <b>GTGGACCCGCG</b> GCA | 3         |
| AAT <b>GTGGGCCCCAC</b> GCA | 3         |
| AAT <b>GTGGTCCCGCG</b> GCA | 3         |
| AAT <b>GTGGACCCCA</b> CGC  | 2         |
| AAT <b>GTGGACCCGAG</b> GCA | 2         |
| AAT <b>GTGGCCCCAG</b> GCA  | 2         |
| TGC <b>GTGGACCCGG</b> AAT  | 2         |
| TGC <b>GTGGGCCCGA</b> AAT  | 2         |
| AAT <b>AGGGAACCCAG</b> GCA | 1         |
| AAT <b>GAGGGCCCGT</b> GCA  | 1         |
| AAT <b>GCGGACCCGG</b> GCA  | 1         |
| AAT <b>GCGGATCCGT</b> GCA  | 1         |
| AAT <b>GTGGACCCAT</b> GCA  | 1         |
| AAT <b>GTGGACCCTA</b> GCA  | 1         |
| AAT <b>GTGGACCCTG</b> GCA  | 1         |
| AAT <b>GTGGCCCCCG</b> GCA  | 1         |
| AAT <b>GTGGCCCCGG</b> GCA  | 1         |
| AAT <b>GTGGCCCCTG</b> GCA  | 1         |
| AAT <b>GTGGGCCCAG</b> GCA  | 1         |
| AAT <b>GTGGGCCCCCG</b> GCA | 1         |
| AAT <b>GTGGGCCCTG</b> GCA  | 1         |
| AAT <b>GTGGGGCCAC</b> GCA  | 1         |
| AAT <b>GTGGTCCCAC</b> GCA  | 1         |
| AAT <b>GTGGTCCCAG</b> GCA  | 1         |
| AAT <b>GTGGTCCCGA</b> GCA  | 1         |
| AAT <b>GTGGTCCCGCG</b> GCA | 1         |
| AAT <b>GTGGTCCCGCG</b> GCA | 1         |
| AAT <b>GTGGTCCCTC</b> GCA  | 1         |
| AAT <b>GTGGTCCCTT</b> GCA  | 1         |
| TGC <b>ATGGACCCAC</b> AAT  | 1         |
| TGC <b>ATGGCCCCAC</b> AAT  | 1         |
| TGC <b>GTGGACCCGA</b> AAT  | 1         |
| TGC <b>GTGGACCCGC</b> AAT  | 1         |
| TGC <b>GTGGACCCGT</b> AAT  | 1         |
| TGC <b>GTGGCCCCGC</b> AAT  | 1         |
| TGC <b>GTGGGCCCAA</b> AAT  | 1         |
| TGC <b>GTGGGCCCCC</b> AAT  | 1         |
| TGC <b>GTGGGGCCAG</b> AAT  | 1         |
| TGC <b>TCGGTCCCAA</b> AAT  | 1         |

**B**

| Oligonucleotide | Sequence            |
|-----------------|---------------------|
| <b>C16</b>      | <b>TGTGGACCCGGG</b> |
| clone S8        | <b>TGTGGACCCGGG</b> |
| clone S14       | <b>CGTGGACCCGGA</b> |

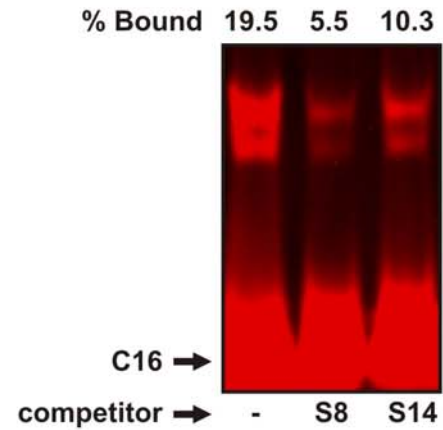

**Supplemental Fig. 3.** *A*, The sequences of 64 clones obtained after 3 rounds of selection with TCP16. The number of clones that contained the same sequence in the same orientation respective to the oligonucleotide arms is shown at the right. Bold letters indicate the region that contains variable nucleotides. *B*, Effect of arm sequences on TCP16 binding. EMSA showing the binding of TCP16 to labelled oligonucleotide C16 in either the absence or presence of a 20-fold molar excess of oligonucleotides containing the same core sequence in different orientations respective to the arms.
