# Supplementary material
Source: PubMed Central journal article supplement (PMC3249086)
Supplement: supp_M111.256271_jbc.M111.256271-7.pdf [file supp_M111.256271_jbc.M111.256271-7.pdf]

|          |   |   |   |   |   |   |   |   |   |    |
|----------|---|---|---|---|---|---|---|---|---|----|
| Sequence | G | T | G | G | G | C | C | C | G | G  |
| Position | 1 | 2 | 3 | 4 | 5 | 6 | 7 | 8 | 9 | 10 |

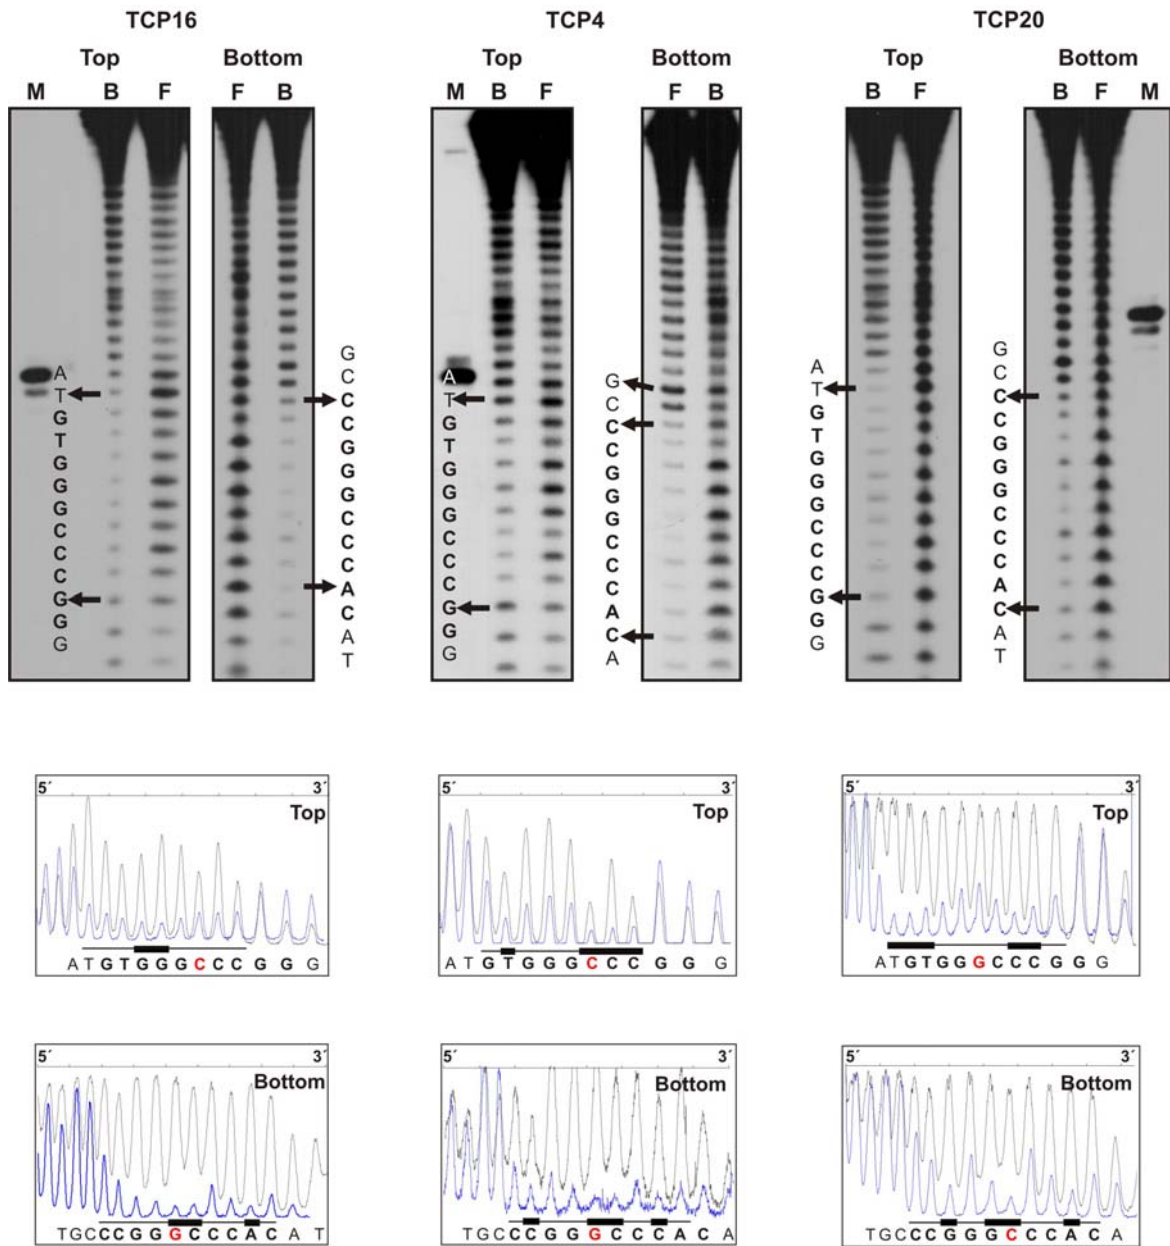

**Supplemental Fig. 4.** Hydroxyl radical footprinting patterns of the complexes of TCP16, TCP4 and TCP20 with an oligonucleotide containing the sequence GTGGGCCCGG. DNA was labelled in the 3' end of one strand (either top or bottom strand, named arbitrarily). After binding of the respective proteins, the DNA was subjected to hydroxyl radical attack. Free (F) and bound (B) DNA were separated and analyzed. The same fragment digested with restriction enzymes was used to calculate the position of the footprint (M). Letters beside each panel indicate the DNA sequence of the corresponding strand (5' end in the upper part). Densitometric scans of the lanes corresponding to free (black line) and bound (blue line) DNA are shown below.
