# Supplementary material
Source: PubMed Central journal article supplement (PMC3249086)
Supplement: supp_M111.256271_jbc.M111.256271-8.pdf [file supp_M111.256271_jbc.M111.256271-8.pdf]

**Supplemental Fig. 5.** Protein sequence alignment of class I and class II TCP domains. The black arrowhead indicates amino acids located at position 11 (class I) or 15 (class II).

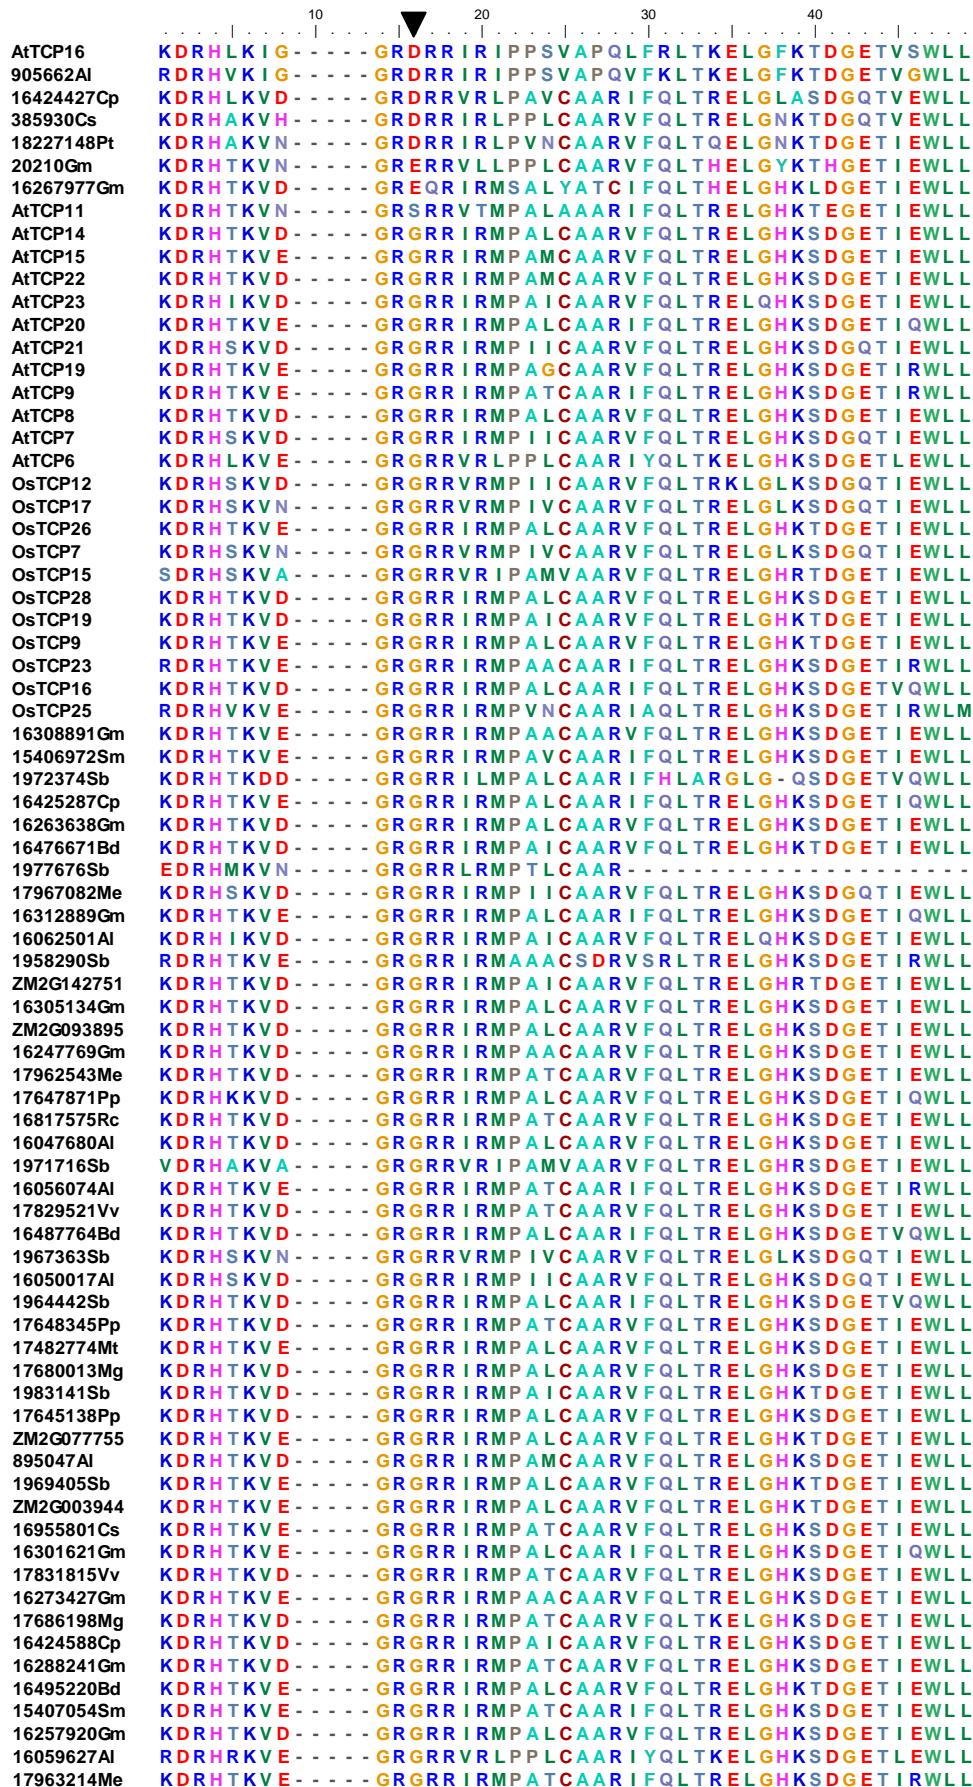

TCP  
Class I

▼

|            |          |                                              |
|------------|----------|----------------------------------------------|
| 17646741Pp | KDRHTKVE | -----GRGRRIRMPALCAARIFQLTRELGHKSDGETIQWLL    |
| 1967495Sb  | KDRHTKVE | -----GRGRRIRMPALCAARVFLQTRRELGHKTDGETIEWLL   |
| 15419540Sm | KDRHTKVE | -----GRGRRIRMPATCAARIFQLTRELGHKSDGETIEWLL    |
| 17675517Mg | KDRHTKVE | -----GRGRRIRMPALCAARIFQLTRELGHKSDGETIQWLL    |
| 1968723Sb  | KDRHSKVD | -----GRGRRIRMPIICAAARVFLQTRRELGHKSDGQTI EWLL |
| 17473522Mt | KDRHTKVE | -----GRGRRIRMPALCAARIFQLTRELGHKSDGETIQWLL    |
| 16968477Cs | KDRHTKVD | -----GRGRRIRMPALCAARVFLQTRRELGHKSDGETIEWLL   |
| 17666244Pp | KDRHTKVE | -----GRGRRIRMPATCAARVFLQTRRELSHKSDGETIEWLL   |
| 1977675Sb  | KDRHTKVD | -----GRGRRIRMPALCAARVFLQTRRELGHKSDGETIEWLL   |
| 17820701Vv | KDRHTKVD | -----GRGRRIRMPALCAARVFLQTRRELGHKSDGETIEWLL   |
| 1973218Sb  | KDRHSKVN | -----GRGRRVRMPIVCAARVFLQTRRELGLKSDGQTI EWLL  |
| 16300993Gm | KDRHTKVD | -----GRGRRIRMPATCAARVFLQTRRELGHKSDGETIEWLL   |
| 16500096Bd | KDRHTKVD | -----GRGRRIRMPALCAARVFLQTRRELGHKSDGETIEWLL   |
| 18063809Ph | KDRHTKVD | -----GRGRRIRMPATCAARIFQLTRELGHKSDGETIEWLL    |
| 18068748Ph | KDRHTKVD | -----GRGRRIRMPATCAARIFQLTRELGHKSDGETIEWLL    |
| 18050840Ph | KDRHTKVD | -----GRGRRIRMPATCAARIFQLTRELGHKSDGETIEWLL    |
| 18042157Ph | KDRHTKVD | -----GRGRRIRMPATCAARIFQLTRELGHKSDGETIEWLL    |
| 18159388Ac | KDRHTKVD | -----GRGRRIRMPATCAARVFLQTRRELGHKSDGETIEWLL   |
| 18209605Pt | KDRHTKVE | -----GRGRRIRMPALCAARIFQLTRELGHKSDGETIQWLL    |
| 18216113Pt | KDRHKKE  | -----GRGRRIRIPALCAARIFQLTRELEHKSDDGETIQWLL   |
| 18197064Si | KDRHTKVD | -----GRGRRIRMPAICAAARVFLQTRRELGHKTDGETIEWLL  |
| 18231329Pt | KDRHTKVD | -----GRGRRIRMPALCAARVFLQTRRELGHKSDGETIEWLL   |
| 18220074Pt | KDRHTKVD | -----GRGRRIRMPAMCAARVFLQTRRELGHKSDGETIEWLL   |
| 18221392Pt | KDRHTKVD | -----GRGRRIRMPAMCAARVFLQTRRELGHKSDGETIEWLL   |
| 18234285Pt | KDRHKKE  | -----GRGRRIRMPALCAARIFQLTRELGKNSDGETIQWLL    |
| 18150763Ac | KDRHTKVD | -----GRGRRIRMPALCAARIFQLTRELGHKSDGETIQWLL    |
| 18225061Pt | KDRHTKVD | -----GRGRRIRMPALCAARVFLQTRRELGHKSDGETIEWLL   |
| 18173673Si | KDRHTKVE | -----GRGRRIRMPALCAARVFLQTRRELGHKTDGETIEWLL   |
| 18142751Ac | KDRHTKVD | -----GRGRRIRMPAVCAARVFLQTRRELGHKSDGETIEWLL   |
| 18225571Pt | KDRHTKVD | -----GRGRRIRMPATCAARVFLQTRRELGHKSDGETIEWLL   |
| 18238295Pt | KDRHTKVE | -----GRGRRIRMPALCAARIFQLTRELGHKSDGETIQWLL    |
| 18234142Pt | KDRHTKVE | -----GRGRRVRMPATCAARIFQLTRELGHKSDGETIRWLL    |
| 16499368Bd | KDRHTKVE | -----GRGRRIRMAAPCAARVARLTLRELGHKSDGETIRWLL   |
| 16305529Gm | KDRHTKVE | -----GRGRRIRIPATCAARIFQLTRELGHKSDGETIRWLL    |
| 18246527Pt | KDRHTKVE | -----GRGRRIRMPAACAAARIFQLTRELGKSDGETIRWLL    |
| 16498028Bd | KDRHTKVD | -----GRGRRIRMPAMCAARVFLQTRRELGHKTDGETIEWLL   |
| 16822587Rc | KDRHTKVE | -----GRGRRIRMPATCAARIFQLTRELGHKSDGETIRWLL    |
| 17661007Pp | KDRHTKVN | -----GRGRRVRMPAMCAARIFQLTRELGHRSDGETIEWLL    |
| 16281410Gm | KDRHTKVE | -----GRGRRIRMPATCAARIFQLTRELGHKSDGETIRWLL    |
| ZM2G178603 | KDRHSKVD | -----GRGRRVRMPIVCAARVFLQTRRELGLKSDGQTI EWLL  |
| ZM2G096610 | ADRHAKE  | -----GRGRRVRIPAMVAARVFLQTRRELGHRTDGETIEWLL   |
| ZM2G445944 | KDRHSKVD | -----GRGRRIRMPIICAAARVFLQTRRELGHKSDGQTI EWLL |
| 17696794Mg | KDRHTKVN | -----GRGRRVRMPALCAARVFLQTRRELGHRSDDGETIEWLL  |
| 16499383Bd | KDRHTKVE | -----GRGRRIRMPAACAAARIFQLTRELGHKSDGETIRWLL   |
| 168431700s | -----    | -----RLSVPTSIAFYDIQDRLGVNRPSPKSI EWLI        |
| 16290997Gm | KDRHTKVN | -----GRGRRVRMPPLCAARIFQLTRELGHRSDGETIEWLL    |
| 17834941Vv | KDRHTKVE | -----GRGRRIRMPATCAARIFQLTRELGHKSDGETIRWLL    |
| 16258200Gm | KDRHTKVE | -----GRGRRIRIPATCAARIFQLTRELGHKSDGETIRWLL    |
| 908782Al   | KDRHSKVD | -----GRGRRIRMPIICAAARVFLQTRRELGHKSDGQTI EWLL |
| 16250847Gm | KDRHTKVE | -----GRGRRIRMPATCAARIFQLTRELGHKSDGETIRWLL    |
| ZMAC199782 | KDRHTKVE | -----GRGRRIRMAAACAAARVARLTLRELGHKSDGETIRWLL  |
| 16815667Rc | KDRHSKVD | -----GRGRRIRMPIICAAARVFLQTRRELGHKSDGQTI EWLL |
| 16495344Bd | KDRHSKVD | -----GRGRRIRMPIICAAARVFLQTRRELGHKSDGQTI DRSA |
| 18205895Si | KDRHSKVN | -----GRGRRVRMPIVCAARVFLQTRRELGLKSDGQTI EWLL  |
| 18180899Si | KDRHTKVE | -----GRGRRIRMAAPCAARVARLTLRELGHKSDGETIRWLL   |
| 16500844Bd | SDRHAKE  | -----GRGRRVRIPAMVAARVFLQTRRELGHRTDGETIEWLL   |
| 18236843Pt | KDRHTKVE | -----GRGRRIRIPATCAARIFQLTRELGHKSDGETIRWLL    |
| 18229840Pt | KDRHTKVE | -----GRGRRVRMPATCAARIFQLTRELGHKSEGETIRWLL    |
| 18163482Ac | KDRHSKVD | -----GRGRRIRMPIICAAARVFLQTRRELGHKSDGQTI EWLL |
| 18164188Ac | KDRHTKVE | -----GRGRRIRMPATCAARIFQLTRELGHKSDGETIRWLL    |
| 17829417Vv | KDRHTKVE | -----GRGRRIRIPATCAARIFQLTRELGHKSDGETIRWLL    |
| 18206849Pt | KDRHSKVD | -----GRGRRIRMPIICAAARVFLQTRRELGHKSDGQTI EWLL |
| ZM2G078077 | KDRHSKVN | -----GRGRRVRMPIVCAARVFLQTRRELGLKSDGQTI EWLL  |
| 16502200Bd | KDRHSKVN | -----GRGRRVRMPIVCAARVFLQTRRELGLKSDGQTV EWLL  |
| 17681482Mg | KDRHTKVE | -----GRGRRIRMPAACAAARIFQLTRELGHKSDGETIRWLL   |
| ZM2G465091 | KDRHSKVN | -----GRGRRVRMPIVCAARVFLQTRRELGLKSDGQTI EWLL  |
| 18223745Pt | KDRHTKVE | -----GRGRRIRMPATCAARIFQLTRELGHKSDGETIRWLL    |
| 17672532Mg | KDRHSKVD | -----GRGRHIRMPIIYAAGVFLQTRRELGHKSDGQTI EWLL  |
| 17833975Vv | KDRHSKVD | -----GRGRRIRMPIICAAARVFLQTRRELGHKSDGQTI EWLL |
| 17668341Pp | KDRHTKVE | -----GRGRRIRMPATCAARIFQLTRELGHKSDGETIRWLL    |
| 17674803Mg | KDRHAKIN | -----GCGRRVRIPALAAARIFQLTRELGNRSDGDTV EWLL   |
| 16278059Gm | KDRHSKVD | -----GRGRRIRMPIICAAARVFLQTRRELGHKSDGQTI EWLL |
| 16493989Bd | KDRHSKVN | -----GRGRRVRMPIVCAARVFLQTRRELGLKSDGQTI EWLL  |
| 16266669Gm | KDRHTKVE | -----GRGRRIRMPATCAARIFQLTRELGHKSDGETIRWLL    |
| 18170681Si | KDRHSKVD | -----GRGRRIRMPIICAAARVFLQTRRELGHKSDGQTI EWLL |
| Ci018801   | KDRHSKVD | -----GRGRRIRMPIICAAARVFLQTRRELGHKSDGQTI EWLL |
| Ci016144   | KDRHTKVE | -----GRGRRIRMPALCAARIFQLTRELGHKSDGETIQWLL    |
| Ci015044   | KDRHTKVE | -----GRGRRIRMPATCAARIFQLTRELGHKSDGETIRWLL    |
| Ci021764   | KDRHTKVN | -----GRGRRVRMPPLCAARIFQLTRELGHRSDGETIEWLL    |

## TCP Class I

▼

|            |                                                     |
|------------|-----------------------------------------------------|
| Ci015906   | KDRHTKVD-----GRGRRIRMPAVCAARVFQLTRELGHKSDGETIEWLL   |
| Ci018374   | KDRHKKVD-----GRGRRIRMPALCAARIFQLTRELGHKSDGETIQWLL   |
| Ci012352   | KDRHTKVE-----GRGRRIRMPAACAAARVFQLTRELGHKSDGETIEWLL  |
| C013545    | KDRHTKVE-----GRGRRIRIPATCAARIFQLTRELGHKSDGETVRWLL   |
| Ci011097   | KDRHTKVD-----GRGRRIRMPALCAARVFQLTRELGHKSDGETIEWLL   |
| Eg021099   | KDRHTKVE-----GRGRRVMPAACAAARIFQLTRELGHKSDGETIRWLL   |
| Eg038354   | KDRHTKVD-----GRGRRIRMPAQCAARVFQLTRELGHKTDGETIEWLL   |
| Eg018268   | KDRHTKVE-----GRGRRIRMPAACAAARIFQLTRELGHKNDGETVRWLL  |
| Eg011715   | KDRHTKVD-----GRGRRIRMPAVCAARVFQLTRELGHKSDGETIEWLL   |
| Eg051391   | RDRHTKVN-----GRGRRIRIPALCAARIFQLTRELGHKSDGETIEWLL   |
| Eg053624   | KDRHTKVD-----GRGRRIRMPALCAARVFQLTRELGHKSDGETIEWLL   |
| 16317250Gm | KDRHTKVE-----GRGRRIRMPATCAARIFQLTRELGHKSDGETIRWLL   |
| 16423768Cp | KDRHSKVD-----GRGRRIRMPAICAAARVFQLTRELGHKSDGQTIWLL   |
| 16316582Gm | KDRHSKVD-----GRGRRIRMPAICAAARVFQLTRELGHKSDGQTIWLL   |
| 18251033Pt | KDRHTKVE-----GRGRRVMPALTAARIFQLTRELGHKSDGETIEWLL    |
| 16421375Cp | KDRHTKVN-----GRGRRVMPALCAARIFQLTRELGHKSDGETIEWLL    |
| 17651445Pp | KDRHTKVE-----GRGRRIRIPATCAARIFQLTRELGHKSDGETVRWLL   |
| 17677950Mg | KDRHTKVE-----GRGRRIRMPAACAAARVFQLTRELGHKSDGETIRWLL  |
| 17650534Pp | KDRHSKVCCTAKG-PRDRRVRLAAHTAIQFYDVQDRLLGYDRPSKAVDWLI |
| 16263800Gm | KDRHSKVCCTIRG-LRDRRIRLSVPTAIQLYDLQDRLLGLSQPSKVIDWLL |
| ZMAC205574 | KDRHSKVCCTARG-PRDRRVRLSAHTAIQFYDVQDRLLGYDRPSKAVDWLI |
| 16407854Cp | RDRHSKINTAKG-PRDRRMRLSLVAKAEFFGLQDMLGYEKASKTVEWLL   |
| 16410588Cp | KDRHSKVWTSKG-LRDRRVRLSVTTAIQFYDLQDRLLGYDQPSKAVEWLI  |
| 16472204Bd | KDRHSKVWTSKG-VRDRRVRLAVPTAIQFYDLQDRLLGFQDQPSKAVDWLL |
| 16411203Cp | KDRHSKIFTAQG-LRDRRVRLSIDIARKFFALQDMLGFDKASKTLDWLL   |
| 16481658Bd | KDRHSKVCCTARG-PRDRRVRLSAHTAIQFYDVQDRLLGYDRPSKAVDWLI |
| 16472785Bd | KDRHSKICTAGG-MRDRRMRLSLDVARKFFALQDMLGFDKASKTVQWLL   |
| 16478318Bd | KDRHSKVYTAGG-IRDRRVRLSVATAIQFYDLQDRLLGYDQPSKAVEWLI  |
| 16317170Gm | KDRHSKIHTSQG-LRDRRVRLSSEIARKFFDLQDMLFEDKPSNTFDWLF   |
| 16428802Cp | KDRHSKVCCTVRG-LRDRRIRLSVPTAIQLYDLQDRLLGLNQPSKVIDWLL |
| Ci032670   | KDRHSKIYTAQG-PRDRRMRLSLQIARKFFDLQDMLGFDKASKTIEWLL   |
| Ci028015   | RDRHSKICTAQQ-FRDRRVRLSIEIAREFFDLQDMLGFDKASKTLEWLF   |
| Ci015257   | KDRHSKVYTSKG-PRDRRVRLSAHTAIQFYDVQDRLLGYDRPSKAVDWLI  |
| Ci008223   | KDRHSKVWTSKG-LRDRRVRLSVTTAIQFYDLQDRLLGVYDQPSKAVEWLI |
| Ci010976   | KDRHSKVCCTAKG-PRDRRVRLSAHTAIQFYDVQDRLLGYDRPSKAVDWLI |
| Ci032667   | KDRHSKINTAKG-PRDRRMRLSLDVARKFFDLQDMLGYDKASKTVEWLM   |
| Eg050438   | KDRHSKVHTAKG-PRDRRVRLSAYTAIQFYDVQDRLLGFDRPSKAVDWLI  |
| C013585    | KDRHSKVCCTIRG-LRDRRIRLSVPTAIQLYDLQDRLLGLSQPSKVIDWLL |
| C012071    | KDRHSKVCCTIRG-LRDRRVRLSVPTAIQLYGLQDRLLGLNQPSKVVWLL  |
| CAOT1262Sm | KDRHSKVNTRAG-PRDRRVRLSVSTAIQFYDIQDRLLGYDQPSKAIWLL   |
| Eg018326   | KDRHSKVRTVRG-LRDRRIRLSAPAAVQLYYLQDILGLTQPSKVIDWLI   |
| Eg017323   | KDRHSKVYTAGG-PRDRRVRLSAHTAIQFYDVQDRLLGYDRPSKAVDWLI  |
| Sm15407669 | KDRHSKVFTAKG-PRDRRVRLSVSTAIQFYDVQDRLLGYDQPSKAVEWLM  |
| 110V6Ph    | KDRHSKVNTRAG-PRDRRVRLSVPTAVQFYDVQDRLLGFQDQPSKAVEWLI |
| OsTCP21    | KDRHSKVYTAGG-IRDRRVRLSVSTAIQFYDLQDRLLGYDQPSKAIWLI   |
| OsTCP1     | KDRHSKVCCTARG-PRDRRVRLSAHTAIQFYDVQDRLLGYDRPSKAVDWLI |
| AtTCP10    | KDRHSKVFTSKG-PRDRRVRLSAHTAIQFYDVQDRLLGYDRPSKAVDWLI  |
| 16495616Bd | KDRHSKVWTSRG-LRDRRIRLSVPTAIQFYDIQDRLLGVYDQPSKAIWLI  |
| 16264256Gm | KDRHSKVCCTAKG-PRDRRVRLAAHTAIQFYDVQDRLLGYDRPSKAVDWLI |
| 16823710Rc | KDRHSKVCCTAKG-PRDRRVRLSAHTAIQFYDVQDRLLGYDRPSKAVDWLI |
| 16288777Gm | KDRHSKVYTAGG-PRDRRVRLSAHTAIQFYDVQDRLLGYDRPSKAVDWLI  |
| 18239062Pt | KDRHSKVCCTAKG-PRDRRVRLSAHTAIQFYDVQDRLLGYDRPSKAVDWLI |
| 17362913At | TDRHSKIKTAGG-TRDRRMRLSLDVAKELFGLQDMLGFDKASKTVEWLL   |
| Eg016729   | KDRHSKINTAQQ-MRDRRMRLSLEVAAREFFNLQDMLGLDKASKTIKWL   |
| 16862301Os | KDRHSKVRTVKG-LRDRRVRLSVPTAIQLYDLQDRLLGLSQPSKVVWLI   |
| 16961496Cs | KDRHSKVCCTAKG-PRDRRVRLSAHTAIQFYDVQDRLLGYDRPSKAVDWLI |
| ZMAC233950 | KDRHSKICTAGG-MRDRRMRLSLDVARKFFALQDMLGFDKASKTVQWLL   |
| 16311812Gm | KDRHSKVCCTIRG-LRDRRVRLSVPTAIHLYDLQDRLLGLNQPSKVVWLI  |
| ZMAC190734 | KDWHKICTAGA-MRDRRMRLSLDVARKFFELQDMLGFDKASKTVQWLI    |
| 18175983Si | KDRHSKVKTVKG-LRDRRVRLSVPTAIQLYDLQDRLLGLNQPSKVVWLI   |
| 16257826Gm | KDRHSKVCCTIRG-LRDRRIRLSVPTAIQLYNLQDKLGFNQPSKVVWLI   |
| Eg049885   | KDRHRKICTAQQ-LRDRRVRLSIEISRFFDLQDMLGFDKASKTLEWLL    |
| Eg014141   | KDRHSKVCCTAKG-PRDRRVRLSAHTAIQFYDVQDRLLGYDRPSKAVDWLI |
| Eg018583   | KDRHSKVCCTIKG-LRDRRVRLSVPTAIQLYDLQDRLLGLSQPSKVVWLI  |
| Eg040933   | KDRHSKIRTVQGG-LRDRRIRLSVQVSRKFFGLQDMLGFDKASKTIEWLL  |
| Eg015738   | KDRHSKIYTARG-PRDRRMRLSLEVAAREFFDLQDMLGFDKASKTVEWLL  |
| Eg014606   | KDRHSKVCCTIRG-LRDRRIRLSVPTAIQLYDLQDKLGLSQPSKVIDWLI  |
| 16061974Al | KDRHSKINTSKG-PRDRRVRLSVSTALQFYDLQDRLLGYDQPSKAVEWLI  |
| 17378847At | KDRHSKVCCTVRG-LRDRRIRLSVPTAIQLYDLQDRLLGLSQPSKVIDWLI |
| 17660534Pp | KERHSKVYTSKG-PRDRRVRLSAPTAIQFYDVQDRLLGYDRPSKAIWLI   |
| 18209307Pt | KDRHSKVCCTIRG-LRDRRVRLSVATAIQLYDLQDRLLGLNQPSKVVWLI  |
| 16498681Bd | TDRHSKIRTAQG-VRDRRMRLSLDVARDFFALQDQLGFDKASKTVDWLI   |
| 17686317Mg | KDRHSKIFTAQG-PRDRRVRLSIGIARKFFDLQEMLGFDKASKTLDWLI   |
| 16804611Rc | KDRHSKVYTAGG-PRDRRVRLSAHTAIQFYDVQDRLLGYDRPSKAVDWLI  |
| 16877682Os | TDRHSKIRTAQG-VRDRRMRLSVGARDFFALQDKLGFDKASRTVEWLL    |
| 17660278Pp | KDRHSKVYTAGG-PRDRRVRLSAHTAIQFYDVQDRLLGYDRPSKAVDWLI  |
| 18231968Pt | KDRHSKVWTSKG-LRDRRVRLSVSTAIQFYDLQDRLLGYDQPSKAVEWLI  |
| ZM2G064628 | TDRHSKIRTAQG-VRDRRMRLSLDVARDFFALQDRLLGFQDQPSKAVDWLI |
| 16258614Gm | RDRHSKINTARG-LRDRRMRLSLEVAKRFFGLQDMLGFDKASKTVDWLI   |

TCP  
Class I

TCP  
Class II

▼

|            |                                                       |
|------------|-------------------------------------------------------|
| 18193228Si | KDRHSKICTAGG-MRDRRMRLSLDVARKFFALQDMLGFDKASKTVQWLL     |
| 16973828Cs | KDRHSKVCTAKG-PRDRRVRLSAHTAIQFYDVQDRLLGYDRPSKAVDWLI    |
| 18169927Si | KDRHSKVRTVKG-LRDRRVRLSVPTAIQLYDLQDRLLGLSQPSKVVDWLL    |
| 16311029Gm | KDRHSKVFTIRG-LRDRRVRLSVPTAIQLYDLQDRLLGLSQPSKVVDWLL    |
| 16953760Cs | KDRHSKVWTSKG-LRDRRVRLSVATAIQFYDLQDRLLGFQEQPSKAVEWLI   |
| 16265078Gm | KDRHSKVYTSKG-PRDRRVRLSAHTAIEFYDVQDRLLGYDRPSKAVDWLI    |
| 16259812Gm | KDRHSKVMTSKG-LRDRRVRLSVTTAIQFYDLQDRLLGYDQPSKAVEWLI    |
| 17823706Vv | KDRHSKIYTAQG-PRDRRMRLSLQIARKFFDLQDILGFDKASKTIEWLFI    |
| 18225754Pt | KDRHSKVWTSQG-LRDRRVRLSVTTAIQFYDLQDRLLGYDQPSKAVEWLI    |
| 17830339Vv | KDRHSKVCTSKG-PRDRRVRLSANTAIFFYDVQDRLLGYDRPSKAVDWLM    |
| 16287845Gm | KDRHSKVCTAKG-PRDRRVRLAAHTAIQFYDVQDRLLGYDRPSKAVDWLI    |
| 18226839Pt | KDRHSKVCTIRG-LRDRRVRLSVPTAIQLYDLQDRLLGLNQP SKVV DWLL  |
| 17676020Mg | KDRHSKVCTAKG-PRDRRVRLAAHTAIQFYDVQDRLLGYDRPSKAVDWLI    |
| 16272765Gm | KDRHSKIHTSQG-LRDRRVRLSIEIARKFFDLQDMLGFDKASNTLDWLF     |
| 18218990Pt | KDRHSKVYTAGG-PRDRRVRLSAHTAIQFYDVQDRLLGYDRPSKAVDWLI    |
| 17838763Vv | KDRHSKVCTVRG-LRDRRVRLSVPTAIQLYDLQDRLLGLNQP SKVV DWLL  |
| 18220855Pt | KDRHSKVYTAGG-PRDRRVRLSAHTAIQFYDVQDRLLGYDRPSKAVDWLI    |
| ZM2G020805 | KDRHSKVYTAGG-IRDRRVRLSVATAIQFYDLQDRLLGYDQPSKAVEWLI    |
| 17664952Pp | KDRHSKVWTSKG-LRDRRVRLSVTTAIQFYDLQDRLLGYDQPSKAVEWLI    |
| 16849564Os | KDRHSKISTAGG-MRDRRMRLSLDVARKFFALQDMLGFDKASKTVQWLL     |
| 16807331Rc | KDRHSKIYTAQG-PRDRRMRLSLQIARKFFDLQDMLGFDKASKTIDWLF     |
| ZM2G166687 | TDRHSKIRTAQG-VRDRRMRLSVGVAR EFFALQDRLLGFDKASKTVNWLL   |
| 17692947Mg | RDRHSKIDTAQG-PRDRRVRLSIGVARKFFDLQEMLGFDKPSKTLDWLL     |
| 18233253Pt | KDRHSKINTAQQ-PRDRRVRLSLKVAR EFFDLQDKLRFDKASKTVEWLL    |
| 16270643Gm | KDRHSKVMTSKG-LRDRRVRLSVNTAIQFYDLQDRLLGYDQPSKAVEWLI    |
| 17641009Pp | KDRHSKVSTVRG-LRDRRIRLSVPTAIQLYDLQDRLLGLSQPSKVIDWLL    |
| 17360709At | KDRHSKVCTLRG-LRDRRVRLSVPTAIQLYDLQERLGLVQDQPSKAVDWLL   |
| 17820873Vv | RDRHSKINTARG-PRDRRMRLSLEIARKFFDLQDMLGFDKASKTVEWLL     |
| 16483278Bd | KDRHSKVRTVKG-LRDRRVRLSVPTAIQLYDLQDRLLGLSQPSKVV DWLL   |
| 16291962Gm | KDRHSKVMTSKG-LRDRRVRLSVTTAIQFYDLQDRLLGYDQPSKAVEWLI    |
| 17825262Vv | KDRHSKVCTAKG-PRDRRVRLSAHTAIQFYDVQDRLLGYDRPSKAVDWLI    |
| 18140802Ac | KDRHSKVCTAKG-PRDRRVRLSAHTAIQFYDVQDRLLGYDRPSKAVDWLI    |
| 16968642Cs | RDRHSKINTLHG-PRDRRMRLSLPVAK EFFGLQDMLGVDKASKTVEWLL    |
| 16311152Gm | KDRHSKIHTSQG-LRDRRVRLSIEIARKFFDLQDMLGFDKASNTLDWLF     |
| 17362435At | KDRHSKVCTAKG-PRDRRVRLSAHTAIQFYDVQDRLLGFDRPSKAVDWLI    |
| 16263902Gm | RDRHSKINTARG-LRDRRMRLSLEVARKFFGLQDMLNFDKASKTVEWLL     |
| 18232641Pt | KDRHSKVCTVRG-LRDRRIRLSVPTAIQLYDLQDRLLGLSQPSKVIDWLL    |
| 17687507Mg | KDRHSKICTAQQ-IRDRRMRLSLHVARKFFDLQD TLGYDKASQTIEWLFI   |
| 17690687Mg | KDKHSKVSTARG-PRDRRLRLSPITAIQFYDVQDRLLGYDRPSKAIDWLI    |
| ZM2G089361 | KDRHSKVYTAGG-IRDRRVRLSVPTAIQFYDLQDRLLGFQDQPSKAVEWLI   |
| 18209353Pt | KDRHSKIYTAQG-LRDRRVRLSIEIARKFFDLQEMLGFDKASKTLDWLL     |
| 16486650Bd | KDRHSKVKTIVKG-LRDRRVRLSVPTAIQLYDLQDRLLGLNQP SKVV DWLL |
| 16272606Gm | KDRHSKVCTIRG-LRDRRVRLSVPTAIQLYDLQDRLLGLSQPSKVV DWLL   |
| 16289957Gm | KDRHSKIYTSQG-LRDRRVRLSIEIARKFFDLQDMLGFDKASNTLDWLF     |
| 16312005Gm | KDRHSKIYTSQG-LRDRRVRLSIAIARKFFDLQDMLGFDKASNTLEWLF     |
| 16850380Os | KDRHSKVYTAGG-IRDRRVRLSVATAIQFYDLQDRLLGFQDQPSKAVEWLI   |
| 17671707Mg | KDRHSKVLTSKG-LRDRRVRLSVNTAIQFYDLQDRLLGYDQPSKAVEWLI    |
| 16305405Gm | RDRHSKINTARG-LRDRRMRLSLEVARKFFGLQDMLGFDKASKTVEWLL     |
| 16292624Gm | KDRHSKVCTAKG-PRDRRVRLSAHTAIQFYDVQDRLLGYDRPSKAVDWLI    |
| 16820989Rc | KHRHSKICTAQQ-LRDRRVRLSIEIARKFFDLQD LLGFDKASKTLEWLL    |
| 18159907Ac | KDRHSKVCTIRG-LRDRRVRLSVPTAIQLYDLQDRLLGLNQP SKVV DWLL  |
| ZM2G166946 | KDRHSKVKTIVKG-LRDRRVRLSVPTAIQLYDLQDRLLGLNQP SKVV DWLL |
| 17691503Mg | KDKHSKVCTASGTTDRRLRLSPKTAIQFYDVQDRLLGYDRPSKAVDWLM     |
| 17353720At | RDRHSKICTAQQ-PRDRRMRLSLQIARKFFDLQDMLGFDKASKTIEWLFI    |
| 17972262Me | KDRHSKVWTSKG-LRDRRVRLSVNTAIQFYDLQDRLLGYDQPSKAVEWLI    |
| 1955624Sb  | KDRHSKVYTAGG-IRDRRVRLSVATAIQFYDLQDRLLGYDQPSKAVEWLI    |
| 17960265Me | RDRHSKIYTAQG-PRDRRMRLSLKVAR EFFDLQDKLCFDKASKTVEWLL    |
| 1950026Sb  | KDRHSKVYTAGG-IRDRRVRLSVPTAIQFYDLQDRLLGFQDQPSKAVEWLI   |
| 17981115Me | KDRHSKVYTSKG-PRDRRVRLSAHTAIQFYDVQDRLLGYDRPSKAVDWLI    |
| 17987200Me | KDRHSKVCTAKG-PRDRRVRLSAHTAIQFYDVQDRLLGYDRPSKAVDWLI    |
| 1981475Sb  | KDRHSKVRTVKG-LRDRRVRLSVPTAIQLYDLQDRLLGLSQPSKVV DWLL   |
| 1963332Sb  | KDRHSKVCTARG-LRDRRVRLAAHTAIRFYDVQDRLLGYDRPSKAVDWLI    |
| 17684730Mg | KDRHSKVCTVKG-LRDRRVRLSVPTAIQLYDLQERLGLNQP SKVV DWLL   |
| 17820778Vv | KDRHSKVCTVRG-LRDRRIRLSVPTAIQLYDLQDRLLGLSQPSKVV DWLL   |
| 1976099Sb  | TDRHSKIRTAQG-VRDRRMRLSVGVAR EFFALQDRLLGFDKASKTVNWLL   |
| 16044941Al | KDRHSKVCTVRG-LRDRRIRLSVMTAIQLYDLQERLGLSQPSKVIDWLL     |
| 17968936Me | KDRHSKIHTAQQ-PRDRRMRLSVQIARKFFNLQDMLGFDKASKTIDWLF     |
| 1963385Sb  | KDRHSKVKTIVKG-LRDRRVRLSVPTAIQLYDLQDRLLGLNQP SKVV DWLL |
| 16041875Al | KDRHSKIHTAQQ-LRDRRVRLSIGIARQFFDLQDMLGFDKASKTLEWLL     |
| 1950625Sb  | KDRHSKICTAGG-MRDRRMRLSLDVARKFFALQDMLGFDKASKTVQWLL     |
| 17962796Me | KDRHSKVSTVRG-LRDRRIRLSVHTALQLYDLQDRLLGLSQPSKVIDWLL    |
| 17695167Mg | KDRHSKIETARG-PRDRRMRLSLEVARKFFDLQD LLGYDKASRTVEWLL    |
| 897773Al   | KDRHSKVCTAKG-PRDRRVRLSAHTAIQFYDVQDRLLGFDRPSKAVDWLI    |
| 1979098Sb  | KDRHSKVVTARG-LRDRRVRLSVPTAIQFYDIQDRLLGVQDQPSKAVEWLI   |
| 902126Al   | KDRHSKVFTSKG-PRDRRVRLSAHTAIQFYDVQDRLLGYDRPSKAVDWLI    |
| 16047865Al | KDRHSKVLTSKG-LRDRRIRLSVATAIQFYDLQDRLLGFQDQPSKAVEWLI   |
| 16055448Al | RDRHSKICTAQQ-PRDRRMRLSLQIARKFFDLQDMLGFDKASKTIEWLFI    |
| 1957550Sb  | TDRHSKIRTAQG-VRDRRMRLSLDVARDFFALQDRLLGFDKASKTVDWLL    |
| 898223Al   | TDRHSKIKTAGG-TRDRRMRLSLDVAKELFGLDMLGFDKASKTVEWLL      |

## TCP Class II

▼

|            |                                                        |
|------------|--------------------------------------------------------|
| 1960224Sb  | KDRHSKVCTARG-PRDRRVRLSAHTAIQFYDVQDRLG YDRPSKAVDWL I    |
| 18039912Ph | KDRHSKVNTAKG-PRDRRVRLSVPTAVQFYDVQDRLGFDQPSKAVEWL I     |
| 18041192Ph | KDRHSKVNTAKG-PRDRRVRLSVPTAVQFYDVQDRLGFDQPSKAVEWL I     |
| 17987558Me | KDRHSKIYTAQG-LRDRRVRLSIEIARKFFDLQDMLG YDKASKTLEWLL     |
| 17830615Vv | KDRHSKVLTSKG-LRDRRVRLSVTTAIQFYDLQDRLG YDQPSKAVEWL I    |
| 17372999At | KDRHSKVCTVRG-LRDRRIRLSVMTAIQVYDLQERLGLSQPSKVIDWLL      |
| 16819325Rc | KDRHSKVCTIRG-LRDRRIRLSVPTAIQLYDLQDRLG LGSQPSKVIDWLL    |
| 16057730Al | KDRHSKVCTLRG-LRDRRVRLSVPTAIQLYDLQERLGV DQPSKAVDWLL     |
| 16869526Os | KDRHSKVYTAGG-IRDRRVRLSVSTAIQFYDLQDRLG YDQPSKAVEWL I    |
| ZM2G120151 | KDRHSKVRTVKG-LRDRRVRLSVPTAIQLYDLQDRLG LGSQPSKVV DWLL   |
| 18230603Pt | KDRHSKVCTAKG-PRDRRVRLSAHTAIQFYDVQDRLG YDRPSKAVDWL I    |
| 16805939Rc | KDRHSKVWTSKG-LRDRRVRLSVTTAIQFYDLQDRLG YDQPSKAVEWL I    |
| 17351927At | KDRHSKVCTAKG-PRDRRVRLSAPTAIQFYDVQDRLG FDRPSKAVDWL I    |
| 16492304Bd | TDRHSKIRTAQG-VRDRRMRLSVGVARDFFDLQD LLGFDKASNTVDWLL     |
| 18176917Si | KDRHSKVCTARG-PRDRRVRLSAHTAIQFYDVQDRLG YDRPSKAVDWL I    |
| 17697396Mg | KDRHSKVCTVRG-LRDRRVRLSVPTAIQLYDLQDRLG LGLNQP SKVIDWLL  |
| 17369179At | KDRHSKVLTSKG-PRDRRVRLSVSTALQFYDLQDRLG YDQPSKAVEWL I    |
| 17829974Vv | KDRHSKVYTAGG-PRDRRVRLSAHTAIQFYDVQDRLG YDRPSKAVDWL I    |
| 16486585Bd | KDRHSKVCTARG-LRDRRVRLAAHTAIRFYDVQDRLG YDRPSKAVDWL I    |
| 17693093Mg | KDRHSKVCTAKG-PRDRRVRLSAPTAIQFYDVQDRLG YDRPSKAVDWL I    |
| 17687164Mg | KDRHSKIRTAQG-IRDRRMRLSLQAARKFFDLQD LLLGFDKASKTIEWLF    |
| 17664732Pp | KDRHSKIFTAQG-LRDRRVRLSINVARQFFDLQD LLLGFDKASKTLEWLL    |
| 16287440Gm | KDRHSKVYTSKG-PRDRRVRLSAHTAIEFYDVQDRLG YDRPSKAVDWL I    |
| 16061733Al | KDRHSKVCTVRG-LRDRRIRLSVPTAIQLYDLQDRLG LGSQPSKVIDWLL    |
| 17841387Vv | KDRHSKITTAKG-PRERRVRLSIIARKFFDLQDMLG FDKASRTLEWLL      |
| 16281483Gm | KDRHSKIHTSQG-LRDRRVRLSSEIARKFFDLQDML EFDKPSNTLEWLF     |
| 16060581Al | KDRHSKVCTAKG-PRDRRVRLSAPTAIQFYDVQDRLG FDRPSKAVDWL I    |
| 18230206Pt | RDRHSKINTAQG-PRDRRMRLSLKVAR EFDLQDKLRFDKASKTVEWLL      |
| 17350301At | KDRHSKVLTSKG-LRDRRIRLSVATAIQFYDLQDRLG FFDQPSKAVEWL I   |
| 18240586Pt | KDRHSKIHTAQG-PRDRRMRLSLQIARKFFDLQDMLG FDKASKTIEWLF     |
| 16256517Gm | KDRHSKVCTIRG-LRDRRIRLSVPTAIQLYDLQDKL GLSQPSKVIDWLL     |
| 18188805Si | KDRHSKVVTARG-LRDRRVRLSVPTAIQFYDIQDRLG V DQPSKAVEWL I   |
| 17446280Mt | KDRHSKVYTAGG-PRDRRVRLSAHTAIQFYDVQDRLG YDRPSKAVDWL I    |
| 16835080Os | KDRHSKVKTVKG-LRDRRVRLSVPTAIQLYDLQDRLG LGLNQP SKVIDWLL  |
| 18184307Si | TDRHSKIRTAQG-VRDRRMRLSLDVARDFFDLQDRLG FFDKASKTVDWLL    |
| 17666782Pp | KDRHSKIYTAQG-PRDRRMRLSLQIARKFFDLQDMLG FFDKASKTIEWLF    |
| 16881524Os | TDRHSKIRTAQG-VRDRRMRLSLDVARDFFDLQDRLG FFDKASKTVDWLL    |
| 16292871Gm | KDRHSKVYTAGG-PRDRRVRLSAHTAIQFYDVQDRLG YDRPSKAVDWL I    |
| 16289009Gm | KDRHSKVCTAKG-PRDRRVRLSAHTAIQFYDVQDRLG YDRPSKAVDWL I    |
| 16304900Gm | KDRHSKVCTIRG-LRDRRIRLSVPTAIELYDLQEK LGLNQP SKVIDWLL    |
| 17655443Pp | RDRHSKINTARG-LRDRRMRLSLEVARKFFWLQD ALHFDDKASKTVEWLL    |
| 18185750Si | TDRHSKIRTAQG-VRDRRMRLSVGVAR EFDLQDRLG FFDKASKTVNWLL    |
| 17641148Pp | KDRHSKVCTVKG-LRDRRVRLSVPTAIQLYDLQERL G LGLNQP SKVIDWLL |
| 18160118Ac | KDRHSKIVTAQG-TRDRRMRLSLEIARKFFDLQD ILGFDKASKTVEWLL     |
| 18163166Ac | --RHSKVLTAQG-LRDRRVRLSVSTAIQFYDLQDRLG YDQPSKAVEWL I    |
| 18182019Si | -----KG-IRDRRVRLSVATAIQFYDLQDRLG YDQPSKAVEWL I         |
| 18196462Si | KDRHSKVYTAGG-IRDRRVRLSVPTAIQFYDLQDRLG FFDQPSKAVEWL I   |
| 18162118Ac | KDRHKTIVTAQG-PRDRRMRLSLDIARRFFMVQDMLG FFDKASKTVEWLL    |

## TCP Class II
